# Supplementary material for: First principles investigation on Na-ion storage in two-dimensional boron-rich B2N, B3N, and B5N
Source: Royal Society of Chemistry journal article supplement (doi:10.1039/d2cp03662b), 2022-12-02
Supplement: d2cp03662b1.pdf [file d2cp03662b1.pdf]

## Supporting Information

### First principle investigation on the Na-ion storage in two-dimensional boron-rich $B_2N$ , $B_3N$ , and $B_5N$

Xingyi Zhou<sup>a</sup>, Fang Liu<sup>a</sup>, Xianfei Chen<sup>a,c\*</sup>, Yi Huang<sup>b,c\*</sup>, Peicong Zhang<sup>a,c</sup>, Beibei Xiao<sup>d</sup>, Wentao  
Zhang<sup>a,c</sup>, Lianli Wang<sup>e</sup>

<sup>a</sup> College of Materials and Chemistry & Chemical Engineering, Chengdu University of Technology, Chengdu 610059, China

<sup>b</sup> College of Environment and Ecology, Chengdu University of Technology, Chengdu 610059, China

<sup>c</sup> State Environmental Protection Key Laboratory of Synergetic Control and Joint Remediation for Soil & Water Pollution, Chengdu University of Technology, Chengdu 610059, China

<sup>d</sup> School of Energy and Power Engineering, Jiangsu University of Science and Technology, Zhenjiang 212003, China

<sup>e</sup> School of Materials Science and Engineering, Xi'an University of Science and Technology, Xi'an 710054, China

---

\* Corresponding author. Email: [chenxianfei2014@cdut.edu.cn](mailto:chenxianfei2014@cdut.edu.cn); [huangyi@cdut.cn](mailto:huangyi@cdut.cn)

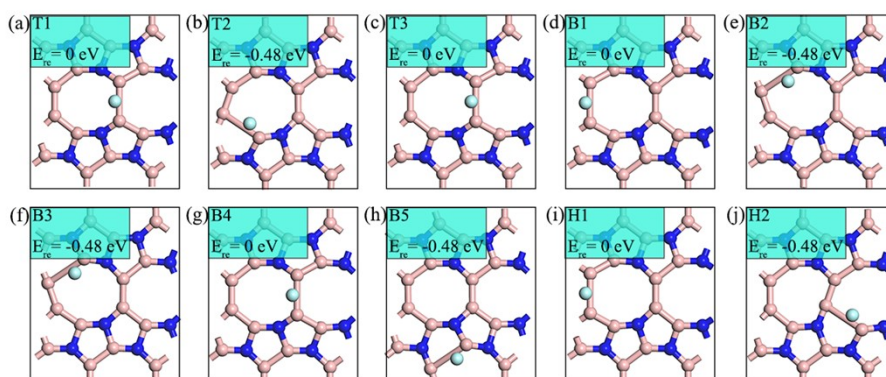

Figure S1. The relaxed configurations of  $B_2N$  with adsorbed fluorine atom. The energies are referenced by the configuration with the highest energy.

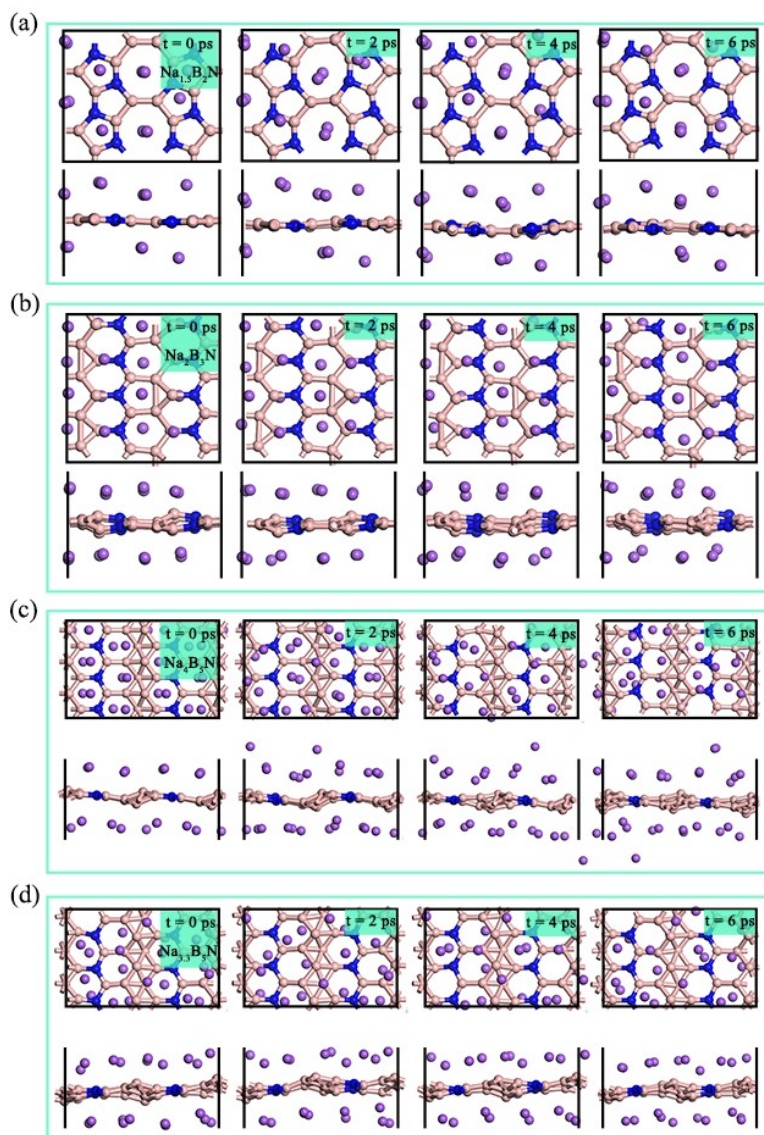

Figure S2. Snap shots of the AIMD simulations performed at 400 K for (a)  $Na_{1.5}B_2N$ , (b)  $Na_2B_3N$ , (c)  $Na_4B_5N$ , and (d)  $Na_{3.3}B_5N$  electrode with a time interval of 2ps.

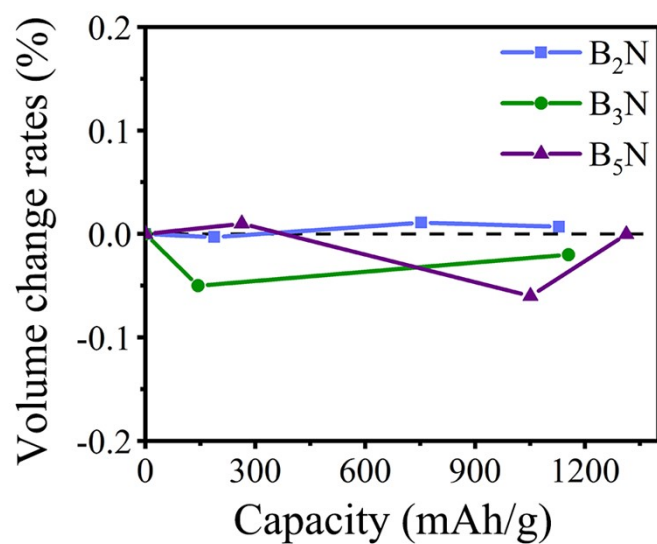

Figure S3. The volume change rate of the emerged stable intermediates.

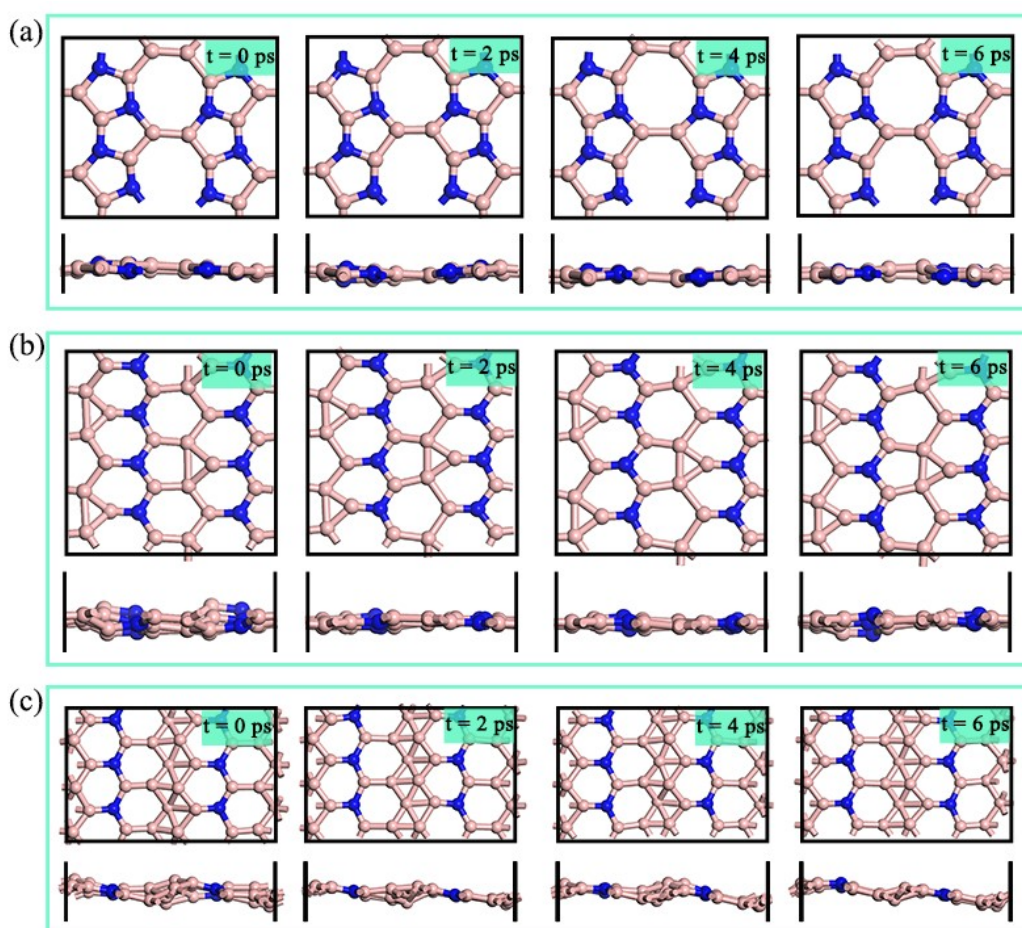

Figure S4. AIMD simulations of the recovery process of (a) B<sub>2</sub>N, (b) B<sub>3</sub>N, and (c) B<sub>5</sub>N electrode with fully removed Na ions. The snapshots are taken with a time interval of 2ps.
